# Supplementary material for: Comprehensive Evaluation of Raw Eating Quality in 81 Sweet Potato (Ipomoea batatas (L.) Lam) Varieties
Source: MDPI journal article supplement (doi:10.3390/foods12020261), 2023-01-06
Supplement: s1 [file s1]

Table S3 KMO and Bartlett's Tests of principal component analysis

|                                                  |                    |          |
|--------------------------------------------------|--------------------|----------|
| Kaiser-Meyer-Olkin Measure of Sampling Adequacy. |                    | 0.653    |
| Bartlett's Test of Sphericity                    | Approx. Chi-Square | 1738.345 |
|                                                  | df                 | 120      |
|                                                  | Sig.               | 0.000    |
