# Supplementary material for: Comprehensive Evaluation of Raw Eating Quality in 81 Sweet Potato (Ipomoea batatas (L.) Lam) Varieties
Source: MDPI journal article supplement (doi:10.3390/foods12020261), 2023-01-06
Supplement: s1 [file s1]

Table S1 The source of eighty-one sweet potato varieties

| No. | Varieties     | Source    | No. | Varieties    | Source    | No. | Varieties  | Source    |
|-----|---------------|-----------|-----|--------------|-----------|-----|------------|-----------|
| 1   | Chuanshu231   | Sichuan   | 28  | Luoshu6      | Henan     | 55  | Sushu28    | Jiangsu   |
| 2   | Eshu15        | Hubei     | 29  | Luosushu18   | Henan     | 56  | Sushu29    | Jiangsu   |
| 3   | Eshu17        | Hubei     | 30  | Luoxushu9    | Henan     | 57  | Sushu23    | Jiangsu   |
| 4   | Eshu19        | Hubei     | 31  | Luozishu6    | Henan     | 58  | Sushu9     | Jiangsu   |
| 5   | Ezishu13      | Hubei     | 32  | Benimasari   | Japan     | 59  | Taishu14   | Shandong  |
| 6   | Funingzi3     | Fujian    | 33  | Miannanshu10 | Sichuan   | 60  | WanA4921   | Anhui     |
| 7   | Fushu604      | Fujian    | 34  | Mianshu8     | Sichuan   | 61  | Wansu4723  | Anhui     |
| 8   | Futian1       | Anhui     | 35  | Mianzishu15  | Sichuan   | 62  | Wansu546   | Anhui     |
| 9   | Ganshu6       | Jiangxi   | 36  | Nanshu022    | Sichuan   | 63  | Wanshu9    | Chongqing |
| 10  | Guangshu18-10 | Guangdong | 37  | Nanshu88     | Sichuan   | 64  | Xinxiang   | Zhejiang  |
| 11  | Guangshu87    | Guangdong | 38  | Nanshu99     | Sichuan   | 65  | Xushu18    | Jiangsu   |
| 12  | Guangzishu9   | Guangdong | 39  | Nanzishu018  | Sichuan   | 66  | Xushu32    | Jiangsu   |
| 13  | Honghong1     | Zhejiang  | 40  | NingB73-8    | Jiangsu   | 67  | Xushu37    | Jiangsu   |
| 14  | Jishu29       | Shandong  | 41  | Ning C2-6    | Jiangsu   | 68  | Xushu44    | Jiangsu   |
| 15  | Jishu33       | Shandong  | 42  | Ningzishu10  | Jiangsu   | 69  | Xuzishu8   | Jiangsu   |
| 16  | Jishu98       | Hebei     | 43  | Ningzishu2   | Jiangsu   | 70  | Yunshu678  | Shanxi    |
| 17  | Jiyuan1       | Hebei     | 44  | Ningzishu3   | Jiangsu   | 71  | Zhanshu16  | Guangdong |
| 18  | Jinshu69      | Zhejiang  | 45  | Ningzishu6   | Jiangsu   | 72  | Zhanshu18  | Guangdong |
| 19  | Liaoshu5      | Liaoning  | 46  | Nongdahong   | Beijing   | 73  | Zhanshu271 | Guangdong |
| 20  | Longshu14     | Fujian    | 47  | Pushu32      | Guangdong | 74  | Zhanshu407 | Guangdong |
| 21  | Longshu24     | Fujian    | 48  | Qining16     | Shandong  | 75  | Zhanshu2   | Guangdong |
| 22  | Longshu14     | Fujian    | 49  | Qining17     | Shandong  | 76  | Zheshu21   | Zhejiang  |
| 23  | Longshu5      | Fujian    | 50  | Qining19     | Shandong  | 77  | Zheshu27   | Zhejiang  |
| 24  | Longshu9      | Fujian    | 51  | Qining26     | Shandong  | 78  | Zheshu70   | Zhejiang  |
| 25  | Longzishu9    | Fujian    | 52  | Qining37     | Shandong  | 79  | Zheshu75   | Zhejiang  |
| 26  | Luoshu10      | Henan     | 53  | Shangshu19   | Henan     | 80  | Zheshu81   | Zhejiang  |
| 27  | Luoshu14      | Henan     | 54  | Sushu25      | Jiangsu   | 81  | Zhezishu1  | Zhejiang  |

Note: Only "Benimasari" is from Japan, other varieties are from China.
